# Supplementary material
Source: publisher figshare collection journal article supplement (https://acs.figshare.com/ndownloader/files/4718902)
Supplement: Supplementary file 1 [file 4718902]

## Supporting information

### From Discrete Linear $t\text{Bu}_2\text{Zn}$ Molecules to 1D Coordination Polymers and 2D Fabrics

*Janusz Lewiński,<sup>\*,†</sup> Maciej Dranka,<sup>†</sup> Wojciech Bury,<sup>†</sup> Witold Śliwiński,<sup>†</sup> Iwona  
Justyniak<sup>‡</sup> and Janusz Lipkowski<sup>‡</sup>*

<sup>†</sup>*Department of Chemistry, Warsaw University of Technology, Noakowskiego 3, 00-664 Warsaw, Poland*

<sup>‡</sup>*Institute of Physical Chemistry, Polish Academy of Sciences, Kasprzaka 44/52, 01-224 Warsaw, Poland*

**Figure S1.** Crystal packing for **1** viewed along  $a$  axis.

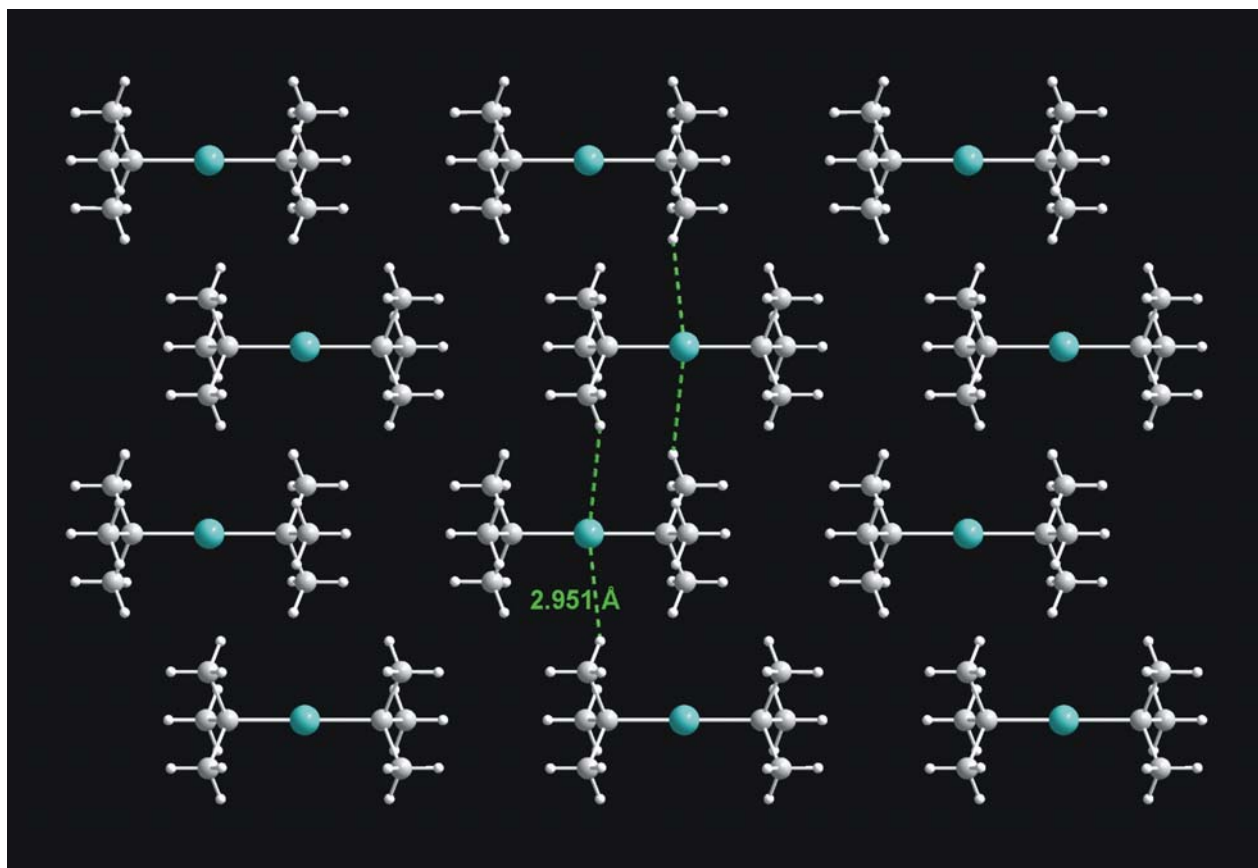

## Experimental Section

### General Remarks:

All reactions were carried out under dry nitrogen using standard Schlenk techniques. Solvents were dried and distilled prior to use. NMR spectra were recorded on a Varian Mercury 400 spectrometer.

### Synthesis and characterization

**[Zn<sup>t</sup>Bu<sub>2</sub>] (1):** Di-*tert*-butylzinc was prepared according the literature procedure.<sup>1</sup> Colorless crystals of **1** suitable for X-ray single-crystal determination were obtained by sublimation at 30°C under vacuum ( $5 \cdot 10^{-2}$  Torr).

**[Zn<sup>t</sup>Bu<sub>2</sub>][1,2-bis(4-pyridyl)ethane] (2):** To a stirred solution of 1,2-bis(4-pyridyl)ethane (0.138 g, 0.75 mmol) in 5 mL THF the solution of Zn<sup>t</sup>Bu<sub>2</sub> in THF (0.135 g, 0.75 mmol) was added dropwise at -78°C. After the addition was completed the reaction mixture was allowed to warm to room temperature, then the volatiles were removed *in vacuo* afforded the yellow residue. Compound **2** is soluble in THF, and also sparingly soluble in aromatic solvents. Square yellow crystals of **2** were obtained from a THF/toluene solution at 0 °C after 4 hours (0,253 g, 93%). <sup>1</sup>H NMR (400 MHz, THF-d<sub>8</sub>): δ = 0.97 (s, 18H, Zn-C(CH<sub>3</sub>)<sub>3</sub>), 2.70 (s, 4H, -(CH<sub>2</sub>)<sub>2</sub>-), 6.90 (d, 4H, Ar), 8.30 (d, 4H, Ar) ppm.

**[Zn<sup>t</sup>Bu<sub>2</sub>][1,2-bis(4-pyridyl)ethylene] (3):** Compound **3** was prepared in similar manner to **2** using 1,2-bis(4-pyridyl)ethylene (0.136 g, 0.75 mmol) in 5 mL THF the solution of Zn<sup>t</sup>Bu<sub>2</sub> in THF (0.135 g, 0.75 mmol). Needlelike dark red crystals of the resulting product were obtained from a THF solution at 0 °C after 4 hours (0,244 g, 90%). <sup>1</sup>H NMR (400 MHz, toluene-d<sub>8</sub>): δ = 1.26 (s, 18H, Zn-C(CH<sub>3</sub>)<sub>3</sub>), 6.48 (s, 2H, -(CH)<sub>2</sub>-), 6.70 (d, 4H, Ar), 8.36 (d, 4H, Ar) ppm.

## X-ray Structure Determination.

Single crystals of **1**, **2** and **3** suitable for X-ray diffraction studies were placed in nujol in an inert atmosphere at -50°C. Then cooled crystals were directly moved to a goniometer head and cooled to -173°C.

*Crystal data for 1*,  $^t\text{Bu}_2\text{Zn}$ ,  $\text{C}_8\text{H}_{18}\text{Zn}$ :  $M = 179.59$ , crystal dimensions  $0.60 \times 0.45 \times 0.20 \text{ mm}^3$ , orthorhombic, space group  $P nma$  (no. 62),  $a = 10.3370(3) \text{ \AA}$ ,  $b = 9.5680(2) \text{ \AA}$ ,  $c = 9.7300(2) \text{ \AA}$ ,  $U = 962.34(4) \text{ \AA}^3$ ,  $Z = 4$ ,  $F(000) = 384$ ,  $D_c = 1.240 \text{ g m}^{-3}$ ,  $T = 100(2)\text{K}$ ,  $\mu(\text{Mo-K}\alpha) = 2.479 \text{ mm}^{-1}$ , Nonius Kappa-CCD diffractometer,  $\theta_{\text{max}} = 23.00^\circ$ , 713 unique reflections. The structure was solved by direct methods using the SHELXS972 program and was refined by full matrix least-squares on  $F^2$  using the program SHELXL97.3 H-atoms were included in idealized positions and refined isotropically. Refinement converged at  $R1 = 0.0299$ ,  $wR2 = 0.0714$  for all data and 49 parameters ( $R1 = 0.0259$ ,  $wR2 = 0.0695$  for 610 reflections with  $I_o > 2\sigma(I_o)$ ). The goodness-of-fit on  $F^2$  was equal 1.188. A weighting scheme  $w = [\sigma^2(F_o^2 + (0.0418P)^2 + 3.1964P)]^{-1}$  where  $P = (F_o^2 + 2F_c^2)/3$  was used in the final stage of refinement. The residual electron density =  $+0.69/-0.30 \text{ e\AA}^{-3}$ . Crystallographic data (excluding structure factors) for the structure reported in this paper have been deposited with the Cambridge Crystallographic Data Centre as supplementary publication no. CCDC - 622313. Copies of the data can be obtained free of charge on application to CCDC, 12 Union Road, Cambridge CB21EZ, UK (fax: (+44)1223-336-033; e-mail: [deposit@ccdc.cam.ac.uk](mailto:deposit@ccdc.cam.ac.uk)).

*Crystal data for 2*,  $[\text{}^t\text{Bu}_2\text{Zn (bpe)}]_n$ ,  $\text{C}_{20}\text{H}_{30}\text{N}_2\text{Zn}$ :  $M = 363.83$ , crystal dimensions  $0.45 \times 0.35 \times 0.20 \text{ mm}^3$ , tetragonal, space group  $I 41/acd$  (no. 142),  $a = 16.2170(11) \text{ \AA}$ ,  $b = 16.2170(11) \text{ \AA}$ ,  $c = 29.604(3) \text{ \AA}$ ,  $U = 7785.6(10) \text{ \AA}^3$ ,  $Z = 16$ ,  $F(000) = 3104$ ,  $D_c = 1.242 \text{ g m}^{-3}$ ,  $T = 100(2)\text{K}$ ,  $\mu(\text{Mo-K}\alpha) = 1.263 \text{ mm}^{-1}$ , Nonius Kappa-CCD diffractometer,  $\theta_{\text{max}} = 21.24^\circ$ , 1089 unique reflections. The structure was solved by direct methods using the SHELXS97<sup>2</sup> program and was refined by full matrix least-squares on  $F^2$  using the program SHELXL97.<sup>3</sup> H-atoms were

included in idealized positions and refined isotropically. Refinement converged at  $R1 = 0.0704$ ,  $wR2 = 0.0768$  for all data and 108 parameters ( $R1 = 0.0304$ ,  $wR2 = 0.0687$  for 613 reflections with  $I_o > 2\sigma(I_o)$ ). The goodness-of-fit on  $F^2$  was equal 0.890. A weighting scheme  $w = [\sigma^2(F_o^2 + (0.0418P)^2 + 3.1964P)]^{-1}$  where  $P = (F_o^2 + 2F_c^2)/3$  was used in the final stage of refinement. The residual electron density =  $+0.18/-0.35 \text{ e}\text{\AA}^{-3}$ . Crystallographic data (excluding structure factors) for the structure reported in this paper have been deposited with the Cambridge Crystallographic Data Centre as supplementary publication no. CCDC - 622314. Copies of the data can be obtained free of charge on application to CCDC, 12 Union Road, Cambridge CB21EZ, UK (fax: (+44)1223-336-033; e-mail: [deposit@ccdc.cam.ac.uk](mailto:deposit@ccdc.cam.ac.uk)).

Crystal data for **3**,  $[\text{tBu}_2\text{Zn (bpene)}]_n$ ,  $\text{C}_{20}\text{H}_{28}\text{N}_2\text{Zn}$ :  $M = 361.81$ , crystal dimensions  $0.50 \times 0.45 \times 0.30 \text{ mm}^3$ , orthorhombic, space group  $Pnna$  (no. 52),  $a = 14.6890(6) \text{ \AA}$ ,  $b = 16.4720(6) \text{ \AA}$ ,  $c = 8.3540(12) \text{ \AA}$ ,  $U = 2021.3(3) \text{ \AA}^3$ ,  $Z = 4$ ,  $F(000) = 768$ ,  $D_c = 1.189 \text{ g m}^{-3}$ ,  $T = 100(2)\text{K}$ ,  $\mu(\text{Mo-K}\alpha) = 1.216 \text{ mm}^{-1}$ , Nonius Kappa-CCD diffractometer,  $\theta_{\text{max}} = 24.70^\circ$ , 1724 unique reflections. The structure was solved by direct methods using the SHELXS97<sup>2</sup> program and was refined by full matrix least-squares on  $F^2$  using the program SHELXL97.<sup>3</sup> H-atoms were included in idealized positions and refined isotropically. Refinement converged at  $R1 = 0.0555$ ,  $wR2 = 0.0685$  for all data and 130 parameters ( $R1 = 0.0288$ ,  $wR2 = 0.0640$  for 1190 reflections with  $I_o > 2\sigma(I_o)$ ). The goodness-of-fit on  $F^2$  was equal 0.966. A weighting scheme  $w = [\sigma^2(F_o^2 + (0.0418P)^2 + 3.1964P)]^{-1}$  where  $P = (F_o^2 + 2F_c^2)/3$  was used in the final stage of refinement. The residual electron density =  $+0.41/-0.34 \text{ e}\text{\AA}^{-3}$ . Crystallographic data (excluding structure factors) for the structure reported in this paper have been deposited with the Cambridge Crystallographic Data Centre as supplementary publication no. CCDC - 622315. Copies of the data can be obtained free of charge on application to CCDC, 12 Union Road, Cambridge CB21EZ, UK (fax: (+44)1223-336-033; e-mail: [deposit@ccdc.cam.ac.uk](mailto:deposit@ccdc.cam.ac.uk)).

- 
- (1) Lehmkuhl, H.; Olbrychs, O. *Liebigs Ann. Chem.* **1975**, 1162.
- (2) "SHELXS-97, Program for Structure Solution": Sheldrick, G.M. *Acta Crystallogr. Sect. A* **1990**, 46, 467.
- (3) Sheldrick, G. M. SHELXL-97, Program for Structure Refinement, Universität Göttingen, 1997.
